# Supplementary material for: The Long-Term Effect of Maternal Iron Levels in the Second Trimester on Mild Thinness among Preschoolers: The Modifying Effect of Small for Gestational Age
Source: MDPI journal article supplement (doi:10.3390/nu15183939), 2023-09-11
Supplement: s1 [file s1]

**Table S1.** Basic characteristics at the second trimester of 2615 eligible singleton mother-infant pairs.

| Characteristics                                     | Total       | SGA ( <i>n</i> =374) | Non-SGA ( <i>n</i> =2241) | <i>P</i> -value |
|-----------------------------------------------------|-------------|----------------------|---------------------------|-----------------|
| <b>Maters</b>                                       |             |                      |                           |                 |
| Maternity Age<br>[years, <i>n</i> (%)]              |             |                      |                           |                 |
| <36                                                 | 2603 (99.5) | 372 (99.5)           | 2231 (99.6)               | 0.815           |
| ≥36                                                 | 12 (0.5)    | 2 (0.5)              | 10 (0.4)                  |                 |
| Maternity BMI<br>[kg/m <sup>2</sup> , <i>n</i> (%)] |             |                      |                           |                 |
| <18.5                                               | 421 (16.1)  | 74 (19.8)            | 347 (15.5)                | 0.019 *         |
| 18.5-25.0                                           | 2050 (78.4) | 288 (77.0)           | 1762 (78.6)               |                 |
| ≥25.0                                               | 144 (5.5)   | 12 (3.2)             | 132 (5.9)                 |                 |
| Gestational age<br>[weeks, <i>n</i> (%)]            |             |                      |                           |                 |
| <37                                                 | 61 (2.2)    | 13 (3.5)             | 48 (2.1)                  | <0.001 ***      |
| 37-42                                               | 2480 (94.8) | 336 (89.8)           | 2144 (95.7)               |                 |
| ≥42                                                 | 74 (2.8)    | 25 (6.7)             | 49 (2.2)                  |                 |
| Parity [ <i>n</i> (%)]                              |             |                      |                           |                 |
| 1                                                   | 2392 (91.5) | 348 (93.0)           | 2044 (91.2)               | 0.239           |
| ≥2                                                  | 223 (8.5)   | 26 (7.0)             | 197 (8.8)                 |                 |
| Gravidity [ <i>n</i> (%)]                           |             |                      |                           |                 |
| 1                                                   | 1729 (66.1) | 274 (73.3)           | 1455 (64.9)               | 0.002 **        |
| ≥2                                                  | 886 (33.9)  | 100 (26.7)           | 786 (35.1)                |                 |
| <b>Infants</b>                                      |             |                      |                           |                 |
| Newborn gender<br>[ <i>n</i> (%)]                   |             |                      |                           |                 |
| Male                                                | 1389 (53.1) | 188 (50.3)           | 1201 (53.6)               | 0.233           |
| Female                                              | 1226 (46.9) | 186 (49.7)           | 1040 (46.4)               |                 |

Notes: BMI, body mass index; SGA, small for gestational age;

\*\*\* *P* <0.001, \*\* *P* <0.01, \* *P* <0.05

**Table S2.** The distribution of maternal essential metal elements concentrations  
at the second trimester for 2615 eligible singleton mother-infant pairs.

| Metal elements | Percentile |       |       |       |       |        |        |       |
|----------------|------------|-------|-------|-------|-------|--------|--------|-------|
|                | Min        | 5     | 25    | 50    | 75    | 95     | Max    | IQR   |
| Cu (μmol/L)    | 11.30      | 16.00 | 20.42 | 24.00 | 27.92 | 33.71  | 40.10  | 7.5   |
| Ca (mmol/L)    | 1.18       | 1.47  | 1.59  | 1.67  | 1.77  | 1.95   | 2.18   | 0.18  |
| Fe (mmol/L)    | 4.59       | 6.21  | 6.97  | 7.48  | 8.00  | 8.80   | 11.55  | 1.03  |
| Mg (mmol/L)    | 1.12       | 1.18  | 1.29  | 1.38  | 1.48  | 1.66   | 2.02   | 0.19  |
| Zn (μmol/L)    | 47.08      | 68.13 | 79.15 | 87.93 | 97.18 | 111.69 | 159.77 | 18.03 |

Notes: Min, minimum; Max, maximum; IQR, inter quartile range; Cu, copper;  
Ca, calcium; Fe, iron; Mg, magnesium; Zn, zinc

**Table S3.** Small for gestational age in relation to tertile maternal essential metal elements concentrations at the second trimester using logistic regression analysis for 1017 eligible singleton preschoolers at 6 years old.

| Metal elements            | SGA        | Non-SGA    | Crude Model <sup>a</sup> | P-value | Adjusted Model 1            | P-value  | Adjusted Model 2            | P-value    |
|---------------------------|------------|------------|--------------------------|---------|-----------------------------|----------|-----------------------------|------------|
|                           |            |            | OR (95% CI)              |         | <sup>b</sup><br>OR (95% CI) |          | <sup>c</sup><br>OR (95% CI) |            |
| Cu (μmol/L)               |            |            |                          |         |                             |          |                             |            |
| 1st tertile (<21.69)      | 126 (33.7) | 745 (33.2) | 1.00                     | -       | 1.00                        | -        | 1.00                        | -          |
| 2nd tertile (21.69-26.62) | 139 (37.2) | 733 (32.7) | 1.12 (0.86-1.46)         | 0.392   | 1.17 (0.90-1.53)            | 0.238    | 1.13 (0.86-1.48)            | 0.385      |
| 3rd tertile (≥26.62)      | 109 (29.1) | 763 (34.1) | 0.84 (0.64-1.11)         | 0.230   | 0.87 (0.66-1.15)            | 0.317    | 0.79 (0.58-1.07)            | 0.122      |
| P for trend               |            |            | 0.241                    |         | 0.334                       |          | 0.137                       |            |
| Ca (mmol/L)               |            |            |                          |         |                             |          |                             |            |
| 1st tertile (<1.62)       | 132 (35.3) | 725 (32.3) | 1.00                     | -       | 1.00                        | -        | 1.00                        | -          |
| 2nd tertile (1.62-1.74)   | 119 (31.8) | 737 (32.9) | 0.89 (0.68-1.16)         | 0.380   | 0.89 (0.68-1.16)            | 0.381    | 0.88 (0.67-1.15)            | 0.344      |
| 3rd tertile (≥1.74)       | 123 (32.9) | 779 (34.8) | 0.87 (0.66-1.13)         | 0.293   | 0.86 (0.66-1.12)            | 0.265    | 0.89 (0.67-1.17)            | 0.401      |
| P for trend               |            |            | 0.293                    |         | 0.265                       |          | 0.398                       |            |
| Fe (mmol/L)               |            |            |                          |         |                             |          |                             |            |
| 1st tertile (<7.16)       | 143 (38.2) | 724 (32.3) | 1.00                     | -       | 1.00                        | -        | 1.00                        | -          |
| 2nd tertile (7.16-7.80)   | 127 (34.0) | 743 (33.2) | 0.86 (0.67-1.12)         | 0.276   | 0.84 (0.64-1.09)            | 0.194    | 0.73 (0.55-0.97)            | 0.028 *    |
| 3rd tertile (≥7.80)       | 104 (27.8) | 774 (34.5) | 0.68 (0.52-0.89)         | 0.006** | 0.69 (0.52-0.91)            | 0.008 ** | 0.55 (0.39-0.77)            | <0.001 *** |
| P for trend               |            |            | 0.006 **                 |         | 0.008 **                    |          | <0.001 ***                  |            |
| Mg (mmol/L)               |            |            |                          |         |                             |          |                             |            |
| 1st tertile (<1.32)       | 115 (30.8) | 691 (30.8) | 1.00                     | -       | 1.00                        | -        | 1.00                        | -          |
| 2nd tertile (1.32-1.45)   | 143 (38.2) | 791 (35.3) | 1.09 (0.83-1.42)         | 0.542   | 1.13 (0.86-1.48)            | 0.371    | 1.24 (0.94-1.64)            | 0.128      |
| 3rd tertile (≥1.45)       | 116 (31.0) | 759 (33.9) | 0.92 (0.70-1.21)         | 0.548   | 0.94 (0.71-1.24)            | 0.654    | 1.13 (0.82-1.55)            | 0.468      |

|                    |       |       |       |
|--------------------|-------|-------|-------|
| <i>P</i> for trend | 0.537 | 0.643 | 0.444 |
| Zn (μmol/L)        |       |       |       |

**Table S3.** Cont.

|                           |            |             |                  |       |                  |       |                  |         |
|---------------------------|------------|-------------|------------------|-------|------------------|-------|------------------|---------|
| 1st tertile (<82.23)      | 117 (31.3) | 753 (33.6)  | 1.00             | -     | 1.00             | -     | 1.00             | -       |
| 2nd tertile (82.23-93.90) | 134 (35.8) | 738 (32.9)  | 1.17 (0.89-1.53) | 0.255 | 1.17 (0.89-1.53) | 0.257 | 1.33 (1.00-1.77) | 0.047 * |
| 3rd tertile (≥93.90)      | 123 (32.9) | 750 (33.5c) | 1.06 (0.80-1.39) | 0.698 | 1.05 (0.80-1.39) | 0.714 | 1.47 (1.06-2.04) | 0.023 * |
| <i>P</i> for trend        |            |             | 0.703            |       | 0.720            |       | 0.020 *          |         |

Notes: SGA, small for gestational age; OR, odd ratio; CI, confidence interval; Cu, copper; Ca, calcium; Fe, iron; Mg, magnesium; Zn, zinc

<sup>a</sup> Crude model.

<sup>b</sup> Adjusted model 1: adjusted for maternity age, maternity BMI, parity, gravidity, newborn gender, gestation age.

<sup>c</sup> Adjusted model 2: adjusted for variables in model 1 and the other four maternal essential metal elements.

\*\*\* *P* <0.001, \*\* *P* <0.01, \* *P* <0.05

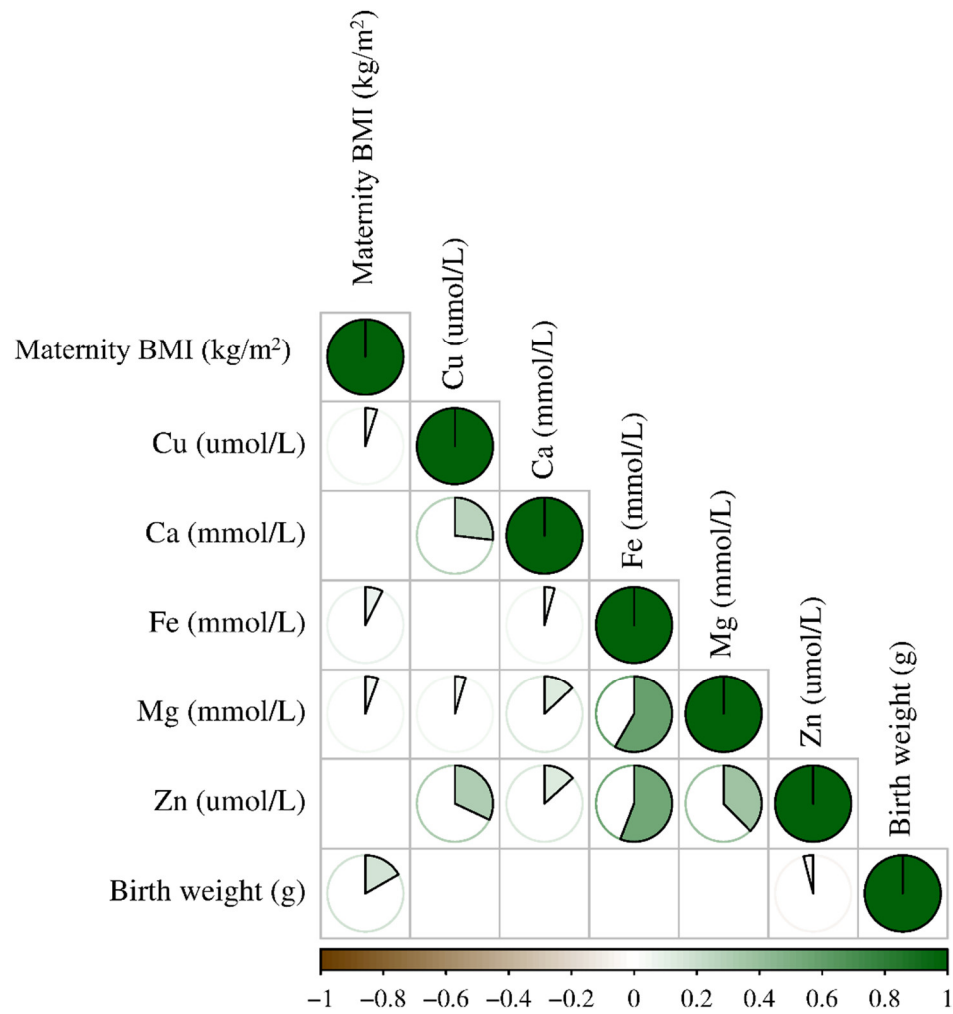

**Figure S1.** Spearman correlations among multiple indexes for 2615 eligible singleton mother-infant pairs. The color depth and the size of the pie indicates the spearman correlation coefficients. Blank gird presents the  $p$ -value less than 0.05.
